# Supplementary material for: Improving aqueous solubility of ciprofloxacin: three different stoichiometric hydrated salt forms with oxalic acid
Source: Royal Society of Chemistry journal article supplement (doi:10.1039/d3ce00514c), 2023-01-01
Supplement: d3ce00514c1.pdf [file d3ce00514c1.pdf]

## Supporting Information

### Improving Aqueous Solubility of Ciprofloxacin: Three Different Stoichiometric Hydrated Salt Forms with Oxalic acid

Peerapon Rapeenun,<sup>a</sup> Phattananawee Nalaoh,<sup>b</sup> Vinich Promarak<sup>b</sup> and Adrian E. Flood<sup>\*a</sup>

<sup>a</sup>School of Energy Science and Engineering (ESE), VISTEC, Wang Chan 21210 Rayong, Thailand.

<sup>b</sup>School of Molecular Science and Engineering (MSE), VISTEC, Wang Chan 21210 Rayong, Thailand.

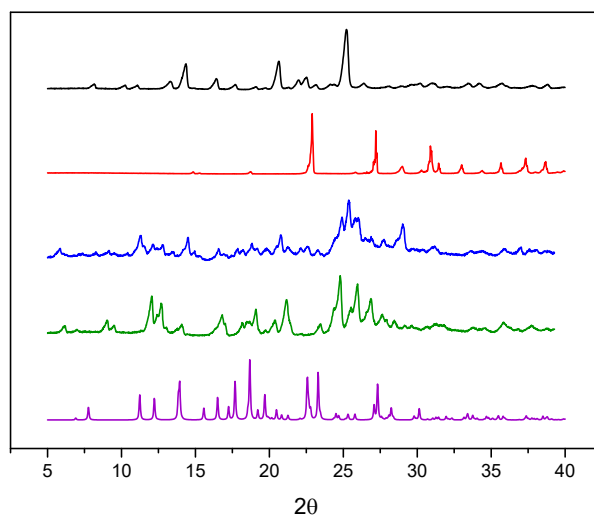

Figure S1 The XRPD patterns show pure ciprofloxacin(black), oxalic acid (red), toluene assistance co-grinding (LAG) (blue), methanol assistance co-grinding (LAG) (green, and ciprofloxacin methanol solvate (purple)<sup>27</sup>.

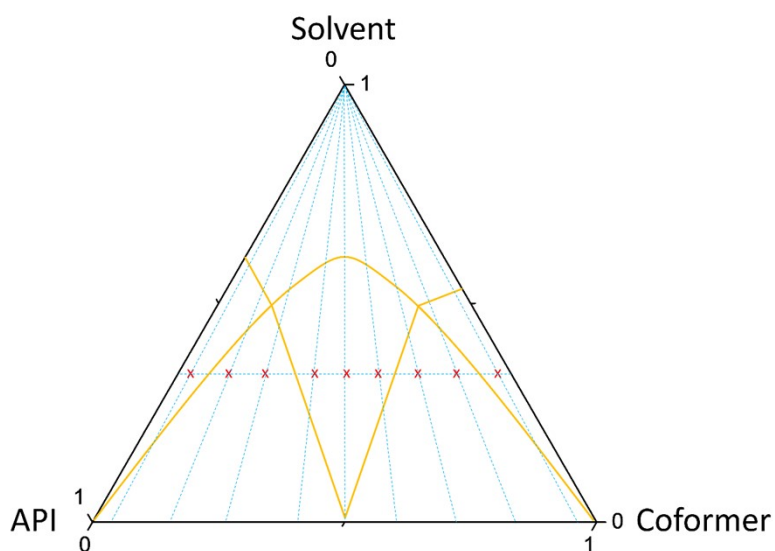

Figure S2 The various ratios of API:Coformer in experiments to construct the ternary phase diagram

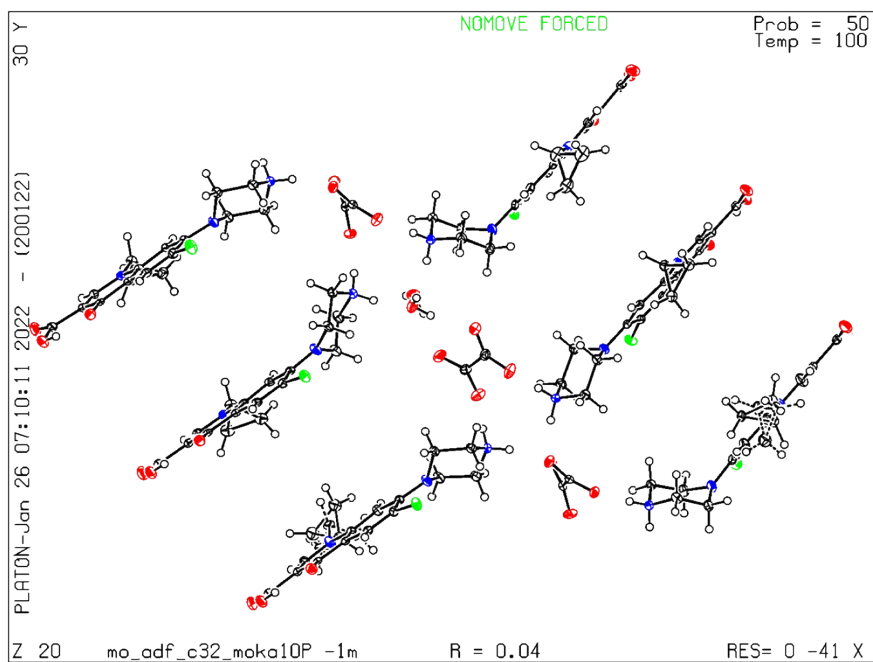

Figure S3 X-ray crystal structure of  $\text{CIF}_6^+ \text{OXA}_3^{2-} \cdot 2\text{H}_2\text{O}$  (form A).

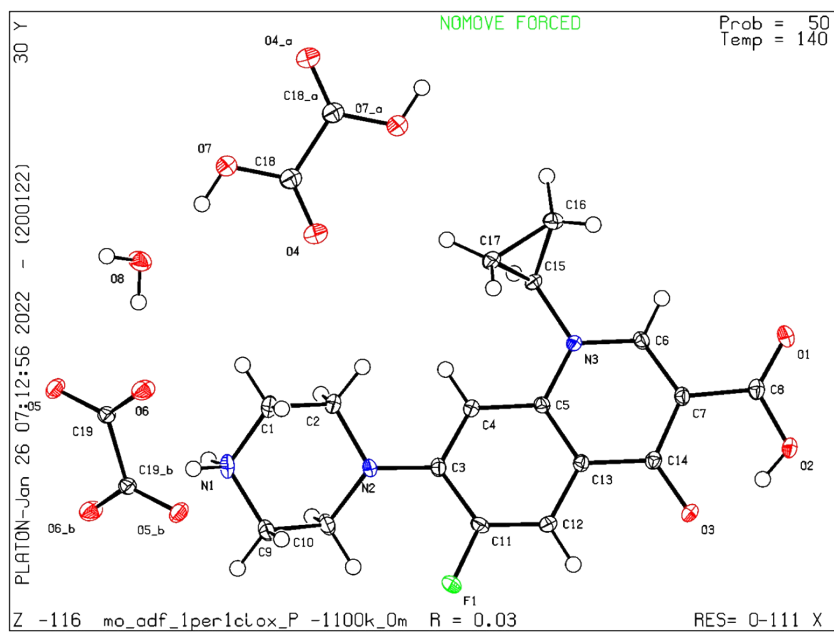

Figure S4 X-ray crystal structure of  $\text{CIF}_2^+ \text{OXA}_1\text{OXA}_1^{2-} \cdot 2\text{H}_2\text{O}$  (form B).

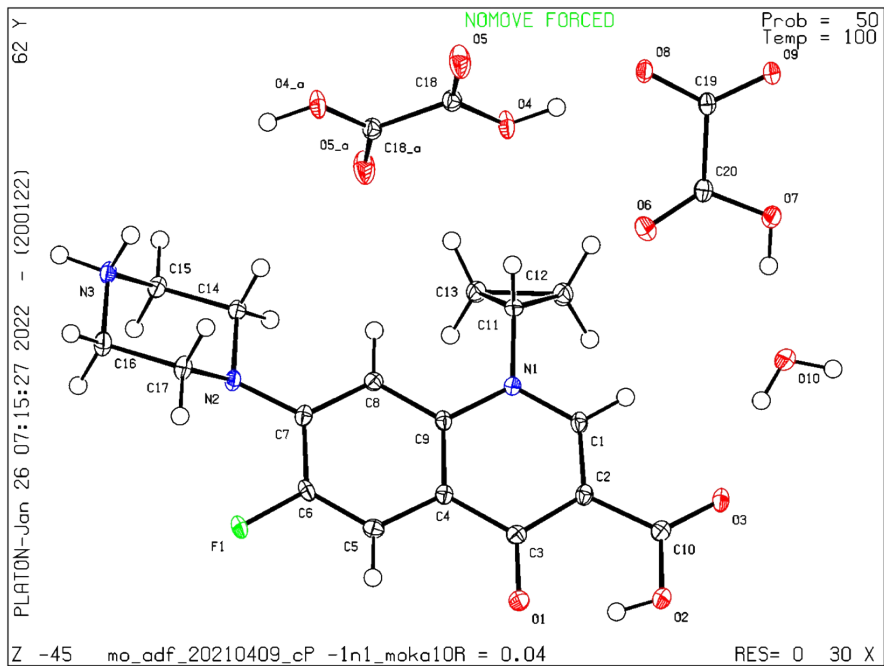

Figure S5 X-ray crystal structure of  $CIF_2^+ OXA_1^- OXA_2^- \cdot 2H_2O$  (form C).

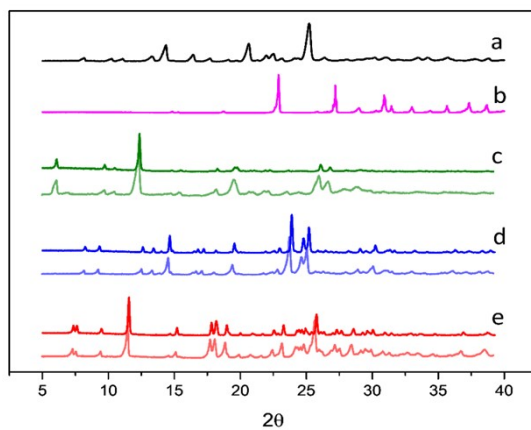

Figure S6 Comparing the x-ray diffraction patterns between experimental patterns (solid line) and patterns calculated from SC-XRD (faded lines) of (a) ciprofloxacin(CIF), (b) oxalic acid(OXA), (c) (form A), (d) (form B), and (e) (form C)

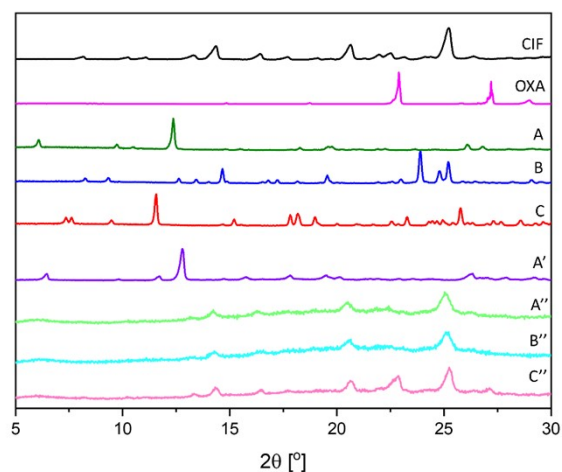

Figure S7 The x-ray diffraction patterns show (CIF) ciprofloxacin, (OXA) oxalic acid, (A) form A, (B) form B, (C) form C, (A') the anhydrous form of form A by annealed form A at 150-200 °C for 15 min under Ar gas, (A'') neat grinding of 2 mole CIF: 1mole OXA (at composition of form A) at 25 Hz for 40 min under Ar gas, (B'') neat grinding of 1 mole CIF: 1mole OXA (at composition of form B) at 25 Hz for 40 min under Ar gas, and (C'') neat grinding of 1 mole CIF: 2mole OXA (at composition of form C) at 25 Hz for 40 min under Ar gas.

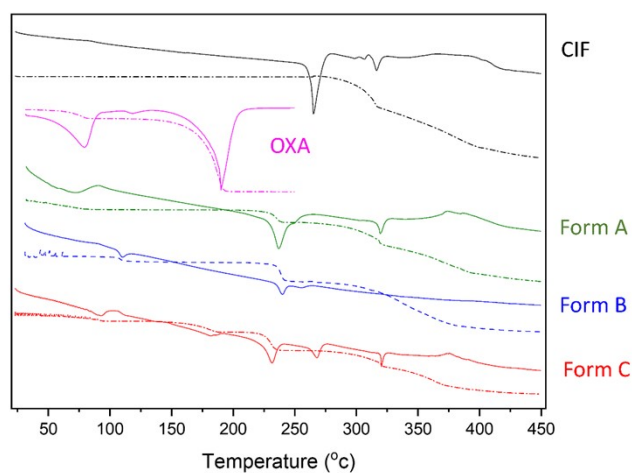

Figure S8 TGA thermal diagram of ciprofloxacin (black), oxalic acid (pink), form A (green), form B (blue), and form C (red). The solid lines represent the normalized DTA and the dashes line represent the normalized mass loss.

### Calculated percent mass loss up to 150°C by TGA

The percent mass loss of form A is 4.12%

$$\frac{2294 \text{ g Form A}}{1 \text{ mol Form A}} \times \frac{4.12}{100} = \frac{94.51 \text{ g H}_2\text{O}}{1 \text{ mol Form A}}$$

The percent mass loss of form B is 3.92%

$$\frac{878 \text{ g Form A}}{1 \text{ mol Form A}} \times \frac{3.92}{100} = \frac{34.42 \text{ g H}_2\text{O}}{1 \text{ mol Form A}}$$

The percent mass loss of form C is 4.22%

$$\frac{968 \text{ g Form A}}{1 \text{ mol Form A}} \times \frac{4.22}{100} = \frac{40.85 \text{ g H}_2\text{O}}{1 \text{ mol Form A}}$$

All three stoichiometric hydrated salts contain 2 mol of water per 1 mol of stoichiometric hydrated salt. Thus, the theoretical mass of water is

$$\frac{18 \text{ g H}_2\text{O}}{1 \text{ mol H}_2\text{O}} \times 2 \text{ mol} = 36 \text{ g of H}_2\text{O loss}$$

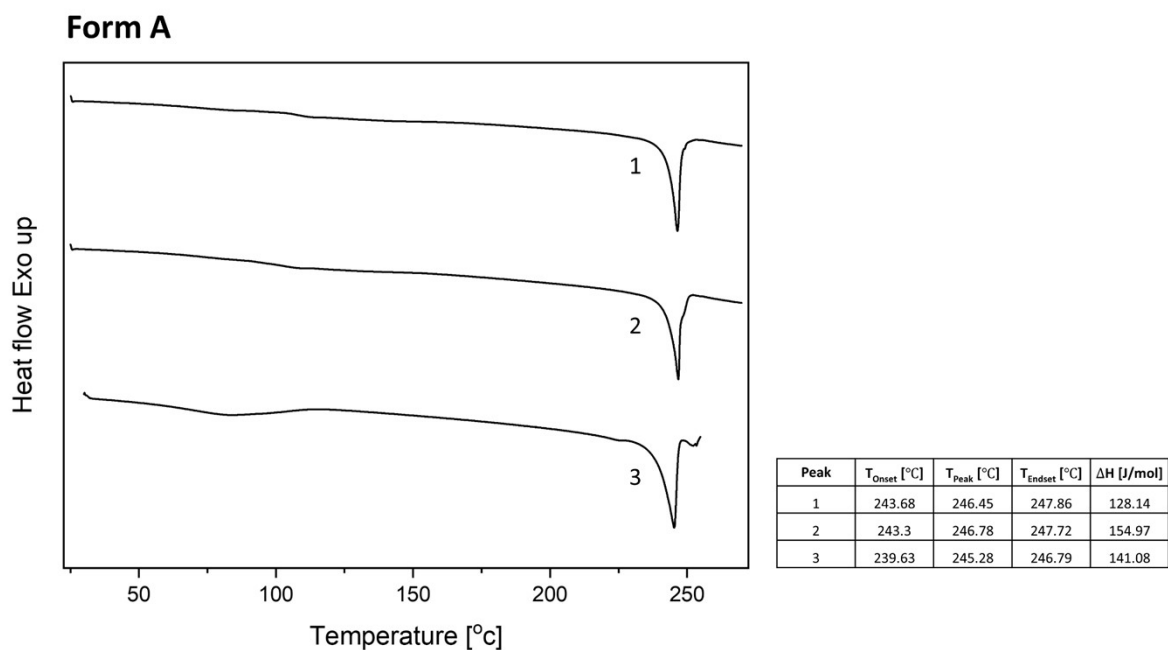

Figure S9 DSC thermogram and the thermal parameters of stoichiometric forms A of hydrated salt.

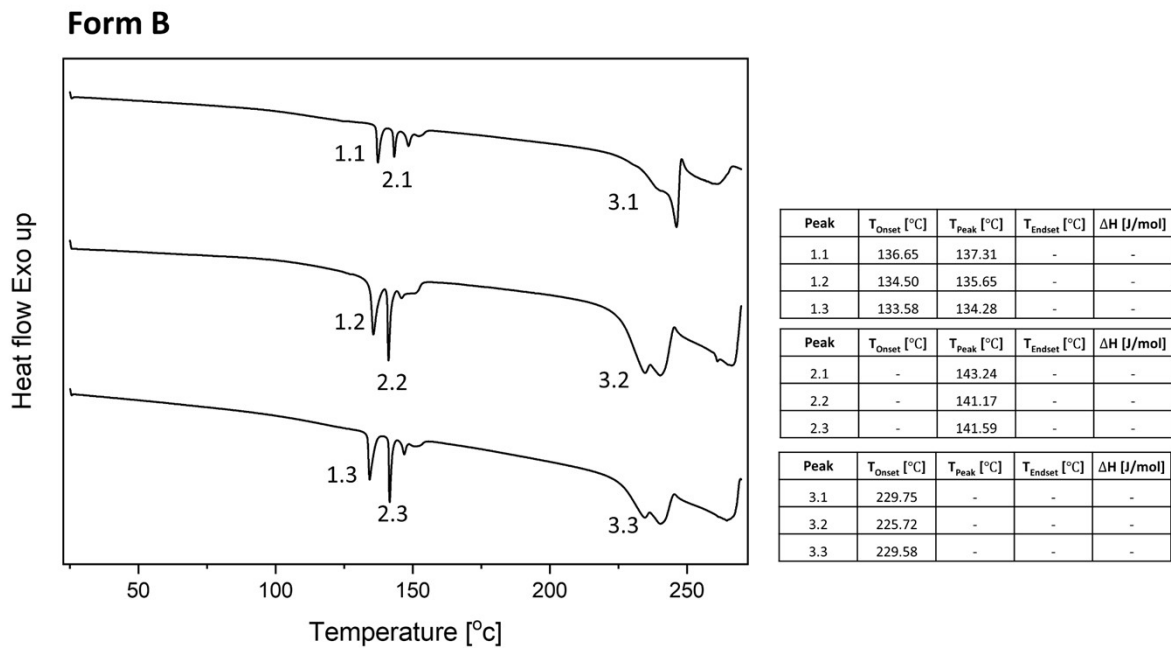

Figure S10 DSC thermogram and the thermal parameters of stoichiometric forms B of hydrated salt.

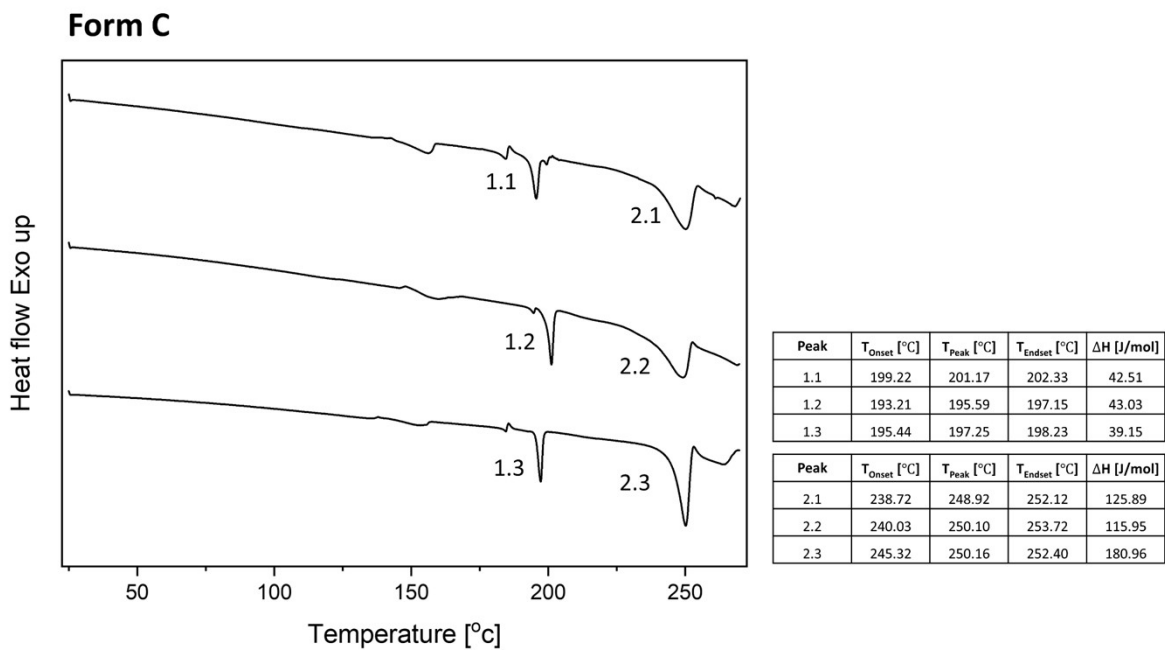

Figure S11 DSC thermogram and the thermal parameters of stoichiometric forms C of hydrated salt.

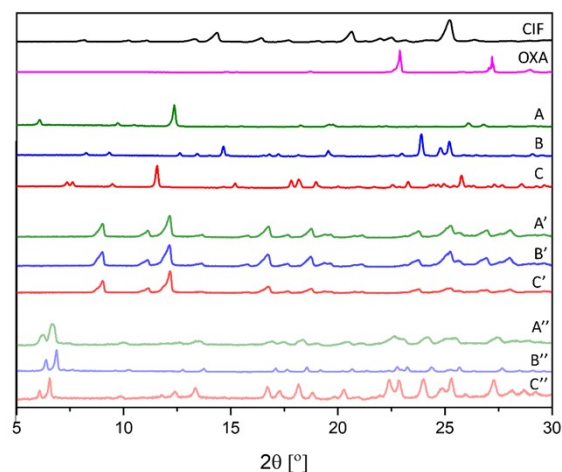

Figure S12 The x-ray diffraction patterns show (CIP) ciprofloxacin, (OXA) oxalic acid, (A) form A, (B) form B, and (C) form C. A', B', and C' are stable solid phases at the equilibrium in pH 4 when dissolving form A, B, C, respectively. A'', B'', and C'' are stable solid phases at the equilibrium in pH 7 when dissolving form A, B, C, respectively.

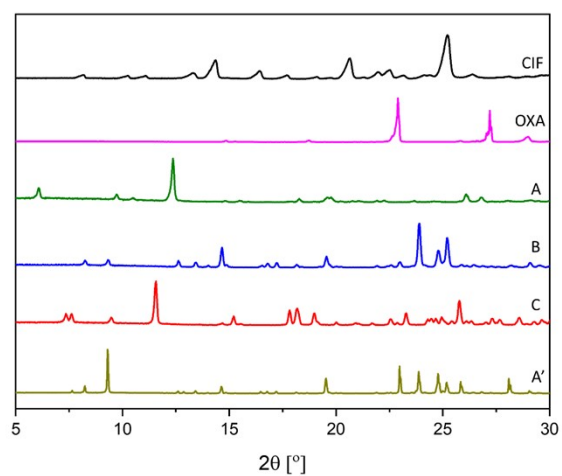

Figure S13 The x-ray diffraction patterns show (CIP) ciprofloxacin, (OXA) oxalic acid, (A) form A, (B) form B, (C) form C, and (A') is the stable solid phase at equilibrium when suspended form C in deionized water.



Table S1 XRPD patterns of multi-component screening section of all candidates. The XRPD patterns show pure ciprofloxacin(black), coformer(red), liquid assistance co-grinding (LAG) with a few drop of toluene(blue), and reusing LAG to slurry cocrystallization in toluene (green).

| Screening XRPD patterns                                                             | Coformer name and structure                                                                                                                | LAG result | Slurry result |
|-------------------------------------------------------------------------------------|--------------------------------------------------------------------------------------------------------------------------------------------|------------|---------------|
| 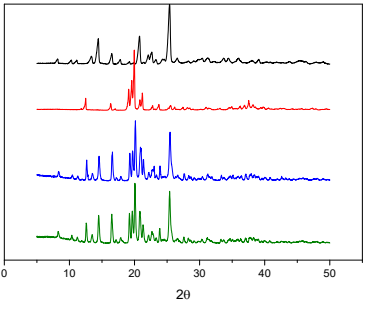   | <p data-bbox="783 454 1002 483">lactose monohydrate</p>  | -          | -             |
|   | <p data-bbox="810 952 975 981">L-phenylalanine</p>     | -          | -             |
|  | <p data-bbox="837 1422 943 1451">L-tyrosine</p>        | -          | -             |

|                                                                                                                                                                                                                                                                                                                                                                                                                |                                                                                                                                                                                                                                                                                                     |          |          |
|----------------------------------------------------------------------------------------------------------------------------------------------------------------------------------------------------------------------------------------------------------------------------------------------------------------------------------------------------------------------------------------------------------------|-----------------------------------------------------------------------------------------------------------------------------------------------------------------------------------------------------------------------------------------------------------------------------------------------------|----------|----------|
| 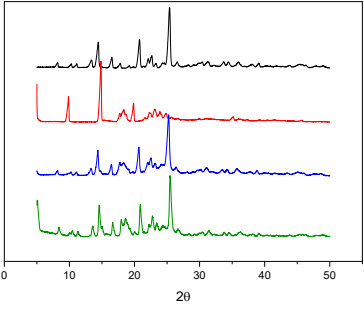 <p>The figure shows four stacked XRD patterns for L-tryptophan. The x-axis is labeled '2θ' and ranges from 0 to 50. The patterns are colored black, red, blue, and green from top to bottom. All patterns show a series of sharp diffraction peaks, with the most prominent ones occurring between 10 and 30 degrees 2θ.</p> | <p><i>L</i>-tryptophan</p>  <p>The chemical structure of L-tryptophan is shown, consisting of an indole ring system attached to a side chain that includes a primary amine group and a carboxylic acid group.</p> | <p>-</p> | <p>-</p> |
|  <p>The figure shows four stacked XRD patterns for L-valine. The x-axis is labeled '2θ' and ranges from 0 to 50. The patterns are colored black, red, blue, and green from top to bottom. The patterns show sharp diffraction peaks, with a notable peak around 10 degrees 2θ.</p>                                            | <p><i>L</i>-valine</p>  <p>The chemical structure of L-valine is shown, featuring an isopropyl side chain attached to the alpha-carbon of the amino acid backbone.</p>                                            | <p>-</p> | <p>-</p> |
|  <p>The figure shows four stacked XRD patterns for L-malic acid. The x-axis is labeled '2θ' and ranges from 0 to 50. The patterns are colored black, red, blue, and green from top to bottom. The patterns exhibit multiple sharp diffraction peaks across the measured range.</p>                                          | <p><i>L</i>-malic acid</p>  <p>The chemical structure of L-malic acid is shown, which is a dicarboxylic acid with a hydroxyl group on the central carbon atom.</p>                                              | <p>-</p> | <p>-</p> |
|  <p>The figure shows four stacked XRD patterns for D-tartaric acid. The x-axis is labeled 'A' and ranges from 0 to 50. The patterns are colored black, red, blue, and green from top to bottom. The patterns show sharp diffraction peaks, with a significant peak around 20 degrees 'A'.</p>                               | <p><i>D</i>-tartaric acid</p>  <p>The chemical structure of D-tartaric acid is shown, which is a dicarboxylic acid with hydroxyl groups on both chiral carbon atoms.</p>                                        | <p>-</p> | <p>-</p> |

|                                                                                                                                                                   |                                                                                                                  |   |   |
|-------------------------------------------------------------------------------------------------------------------------------------------------------------------|------------------------------------------------------------------------------------------------------------------|---|---|
| 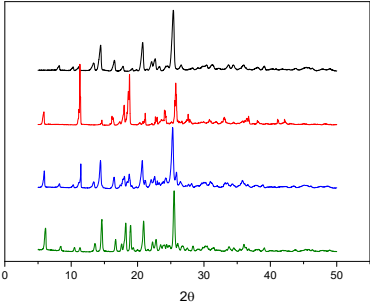                                                                                 | <p>Rac-phenyl glycinamide</p>  | - | - |
|  <p>*Blue pattern is LAG with toluene</p> <p>*Green pattern is LAG with MeOH</p> | <p>oxalic acid</p>            | + | + |

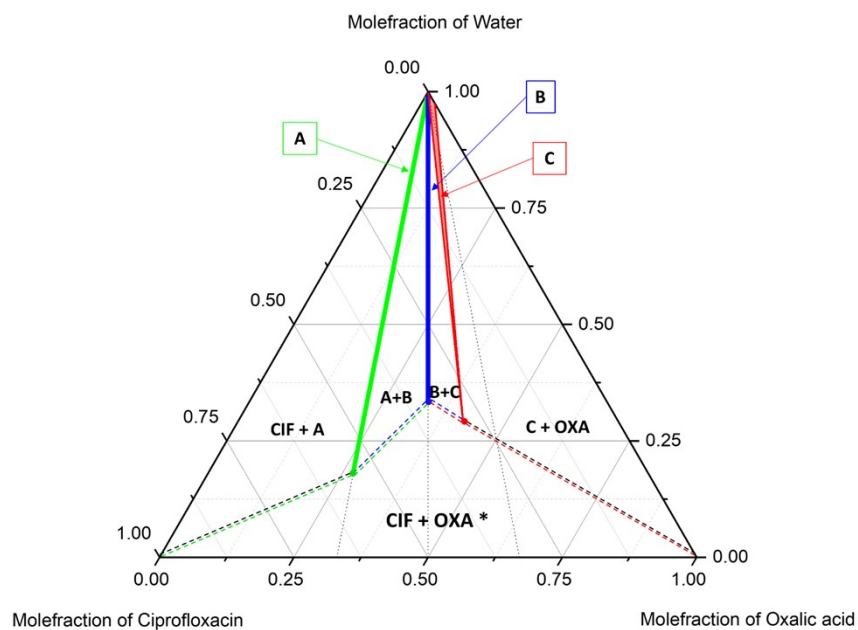

Figure S14 The full scale of ternary phase diagram of CIF-OXA system; product form A (green, A), product form B (blue, B), and product form C (red, C)

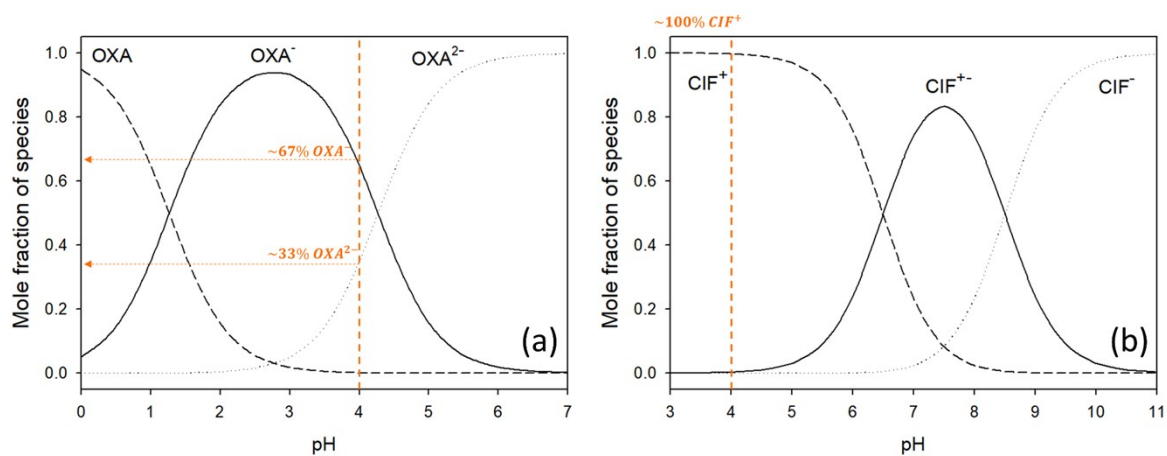

Figure S15 Percentages speciation diagram of CIF (a) and OXA (b) at pH 4 of buffer solution. <sup>7,24,25</sup>.

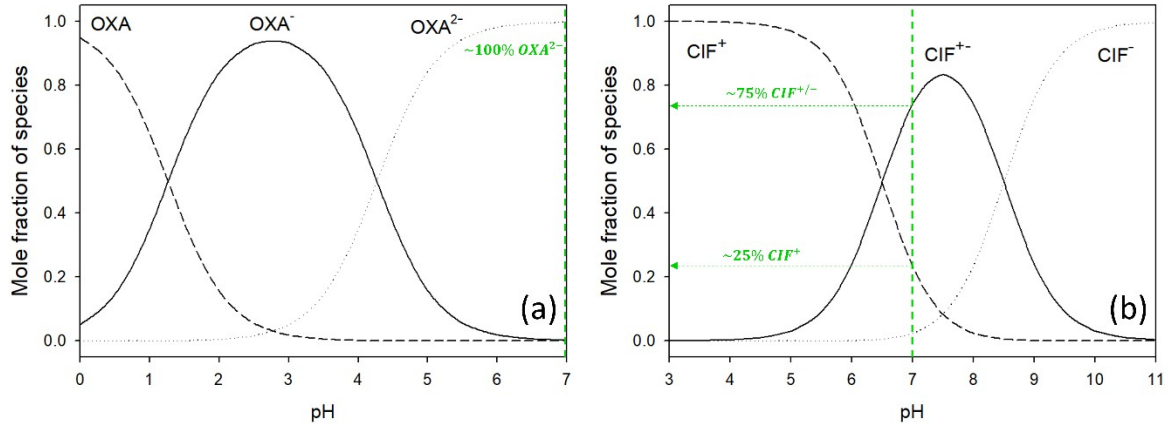

Figure S16 Percentages speciation diagram of CIF (a) and OXA (b) at pH 7 of buffer solution. <sup>7,24,25</sup>

**Equilibrium moving at Buffer pH4;**

**Form A** ( $CIF_6^+ OXA_3^{2-} \cdot 2H_2O$ );

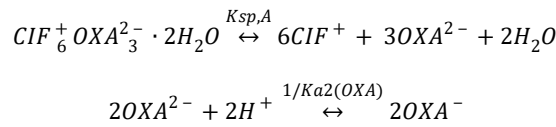

$\therefore \Sigma H^+ = +2H^+$  (To be 67% of  $OXA^-$ , 33% of  $OXA^{2-}$ , and 100% of  $CIF^+$  at equilibrium base on speciation diagram at pH4)

**Form B** ( $CIF_2^+ OXA_1 OXA_1^{2-} \cdot 2H_2O$ );

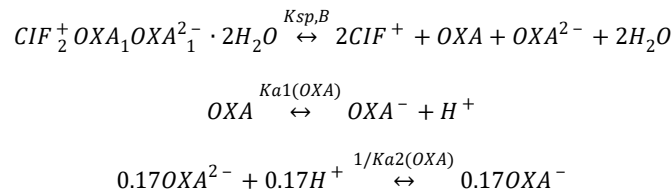

$\therefore \Sigma H^+ = -0.83H^+$  (To be 67% of  $OXA^-$ , 33% of  $OXA^{2-}$ , and 100% of  $CIF^+$  at equilibrium base on speciation diagram at pH4)

**Form C** ( $CIF_2^+ OXA_1 OXA_2^- \cdot 2H_2O$ );

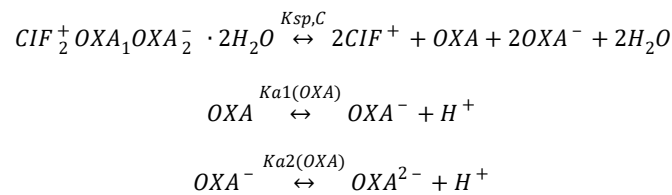

$\therefore \Sigma H^+ = -2H^+$  (To be 67% of  $OXA^-$ , 33% of  $OXA^{2-}$ , and 100% of  $CIF^+$  at equilibrium base on speciation diagram at pH4)

**Equilibrium moving at Buffer pH7:**

**Form A** ( $CIF_6^+ OXA_3^{2-} \cdot 2H_2O$ );

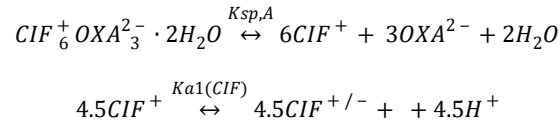

$\therefore \Sigma H^+ = -4.5H^+$  (To be 100% of  $OXA^{2-}$ , 75% of  $CIF^{+/-}$ , and 25% of  $CIF^+$  at equilibrium base on speciation diagram at pH7)

**Form B** ( $CIF_2^+ OXA_1 OXA_1^{2-} \cdot 2H_2O$ );

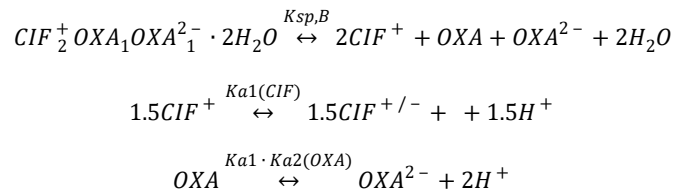

$\therefore \Sigma H^+ = -3.5H^+$  (To be 100% of  $OXA^{2-}$ , 75% of  $CIF^{+/-}$ , and 25% of  $CIF^+$  at equilibrium base on speciation diagram at pH7)

**Form C** ( $CIF_2^+ OXA_1 OXA_2^- \cdot 2H_2O$ );

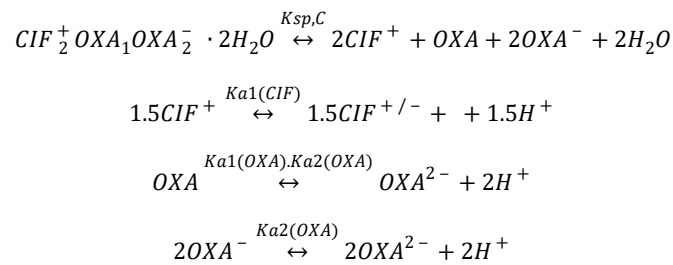

$\therefore \Sigma H^+ = -5.5H^+$  (To be 100% of  $OXA^{2-}$ , 75% of  $CIF^{+/-}$ , and 25% of  $CIF^+$  at equilibrium base on speciation diagram at pH7)
